# Supplementary material
Source: PubMed Central journal article supplement (PMC7958406)
Supplement: 12882_2021_2296_MOESM2_ESM.pdf [file 12882_2021_2296_MOESM2_ESM.pdf]

# Thromboprophylaxis of patients on HDU/ICU with COVID-19 at University Hospital Southampton

## Key Points:

1. Hospitalised COVID-19 patients are at high VTE risk
2. A high incidence of VTE has been reported in COVID-19 patients on ICU despite standard dose thromboprophylaxis
3. A high D-dimer  $\pm$  disseminated intravascular coagulation are associated with poor prognosis
4. There is evidence LMWH prophylaxis is associated with reduced mortality in severe COVID-19
5. Only give platelet transfusions if platelets  $<20$  with minor/no bleeding,  $<50$  and moderate bleeding or  $<75$  and major bleeding
6. Only give FFP if INR  $>1.5$  and moderate-severe bleeding
7. Only give cryoprecipitate if fibrinogen is  $<2$  and moderate-severe bleeding

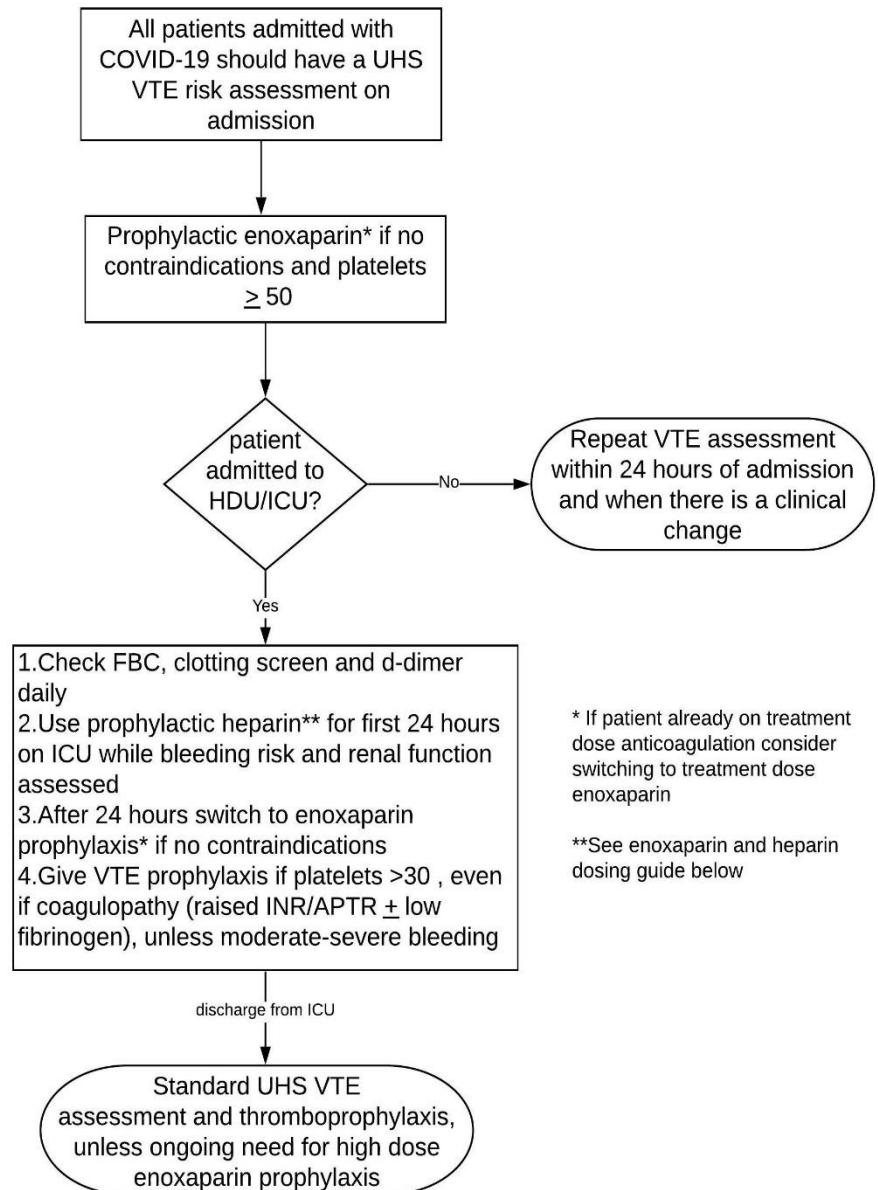

## Further information:

[University Hospital Southampton Thromboprophylaxis and Risk Assessment Guideline: Appendix C Risk Assessment](#)

[BSH Interim Guidance:](#)

<https://thrombosisuk.org/downloads/T&H%20and%20COVID.pdf>

[ISTH Interim Guidance:](#)

<https://onlinelibrary.wiley.com/doi/epdf/10.1111/jth.14810>

[ISTH Academy:](#)

[https://academy.isth.org/isth/#!\\*menu=8\\*browseby=8\\*sortby=2\\*label=1979](https://academy.isth.org/isth/#!*menu=8*browseby=8*sortby=2*label=1979)

April 2020: version 1

Authors: Dr Sara Boyce (consultant haematologist)

Dr Kathleen Nolan (critical care consultant)

Dr Rashid Kazmi (consultant haematologist)

## Thromboprophylaxis of patients on HDU/ICU with COVID-19 at University Hospital Southampton

| Weight     | Enoxaparin dose for VTE prophylaxis <sup>1,2,3</sup> | Heparin dose for VTE prophylaxis <sup>1,2,3</sup> | Anticoagulation prophylaxis with haemofiltration                                                                                                                                                     |
|------------|------------------------------------------------------|---------------------------------------------------|------------------------------------------------------------------------------------------------------------------------------------------------------------------------------------------------------|
| <50 kg     | Enoxaparin 40mg od                                   | Heparin 5000 units bd                             | Intravenous heparin (APTR 1.5-2.5)<br><br>If unable to obtain target APTR despite increasing doses of heparin or patient clots despite target APTR send anti Xa levels (target 0.3-0.7) <sup>4</sup> |
| <100 kg    | Enoxaparin 40mg bd                                   | Heparin 5000 units tds                            |                                                                                                                                                                                                      |
| 100-150 kg | Enoxaparin 60mg bd                                   | Heparin 5000 units tds                            |                                                                                                                                                                                                      |
| >150 kg    | Enoxaparin 80mg bd                                   | Heparin 7500 units tds                            |                                                                                                                                                                                                      |

1. Enoxaparin doses should be reduced by 50% if creatinine clearance 15-30. If creatinine clearance <15 give s/c unfractionated heparin prophylaxis

2. Standard enoxaparin/heparin prophylactic doses (see UHS VTE risk assessment policy) should be given if platelet count 30-50, enoxaparin/heparin should be omitted if platelet count <30

3. All patients should have their anti Xa levels monitored to ensure adequate anticoagulation (see below)

4. If patient not achieving target anti Xa levels, or clotting despite therapeutic enoxaparin/heparin, check antithrombin, factor VIII and VWF antigen and discuss with a senior haematologist

All patients should be assessed for need for mechanical thromboprophylaxis using UHS VTE risk assessment

# Thromboprophylaxis of patients on HDU/ICU with COVID-19 at University Hospital Southampton

## Anti Xa monitoring of enoxaparin

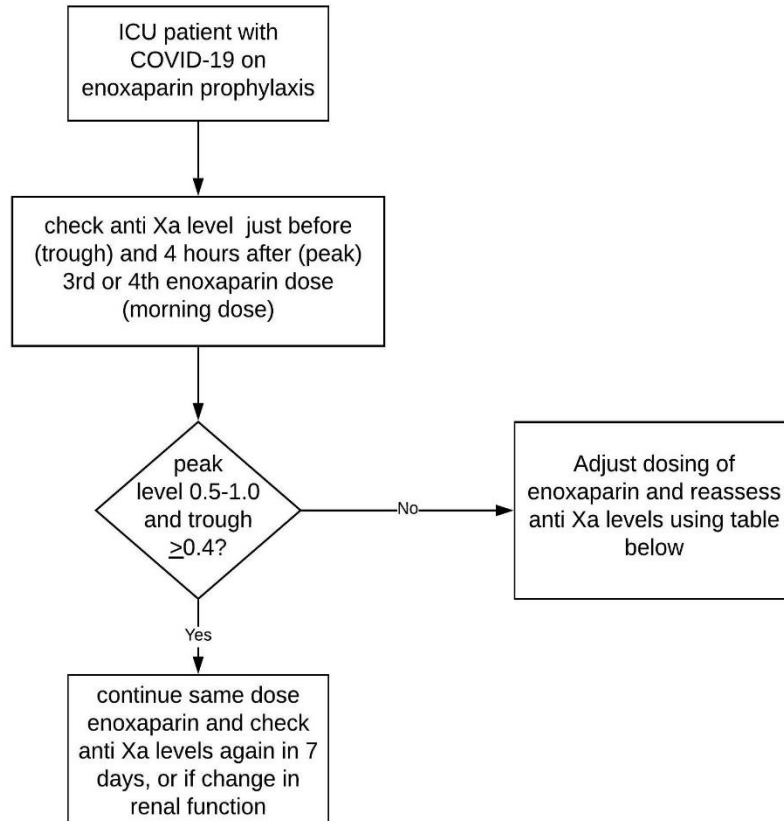

| Peak anti Xa level | Delay next dose    | Enoxaparin dose change | Recheck peak (4 hour) anti Xa levels                  |
|--------------------|--------------------|------------------------|-------------------------------------------------------|
| <0.35              | no                 | Increase 25%           | After next morning dose                               |
| 0.35-0.49          | no                 | Increase 10%           | After next morning dose                               |
| 0.5-1              | no                 | No change              | 7 days, or if change in renal function                |
| 1.1-1.5            | no                 | Decrease 20%           | After next morning dose                               |
| 1.6-2.0            | 3 hours            | Decrease 30%           | After next morning dose                               |
| >2                 | Until anti Xa <0.6 | Decrease by 40%        | When next dose due, then 12 hourly until anti Xa <0.6 |

## Thromboprophylaxis of patients on HDU/ICU with COVID-19 at University Hospital Southampton

If trough level anti Xa  $<0.4$  and peak level in/above target range discuss with haematologist (clotting phone 007585880224)

### **Anti Xa monitoring of subcutaneous heparin prophylaxis**

- Anti Xa levels should be checked 6 hours after the first morning heparin dose, if the patient is not being converted to enoxaparin or IV heparin within the next 24 hours
- Aim for a target of anti Xa 0.2-0.5
- If level  $<0.25$  increase heparin dose by 25%
- If level  $>0.5$  reduce heparin dose by 25%
- After dose changes recheck the anti Xa level 6 hours after the next morning dose
